# Supplementary material for: A genetically encoded single-wavelength sensor for imaging cytosolic and cell surface ATP
Source: PubMed Central journal article supplement (PMC6372613; doi:10.1038/s41467-019-08441-5), 2019-02-12
Supplement: 41467_2019_8441_MOESM1_ESM.pdf [file 41467_2019_8441_MOESM1_ESM.pdf]

# **A genetically encoded single-wavelength sensor for imaging cytosolic and cell surface ATP**

Lobas et al.,

lg-kappa leader sequence  
 epsilon subunit  
 linkers 1 and 2

GFP  
 GGTGGS linker  
 Myc epitope

PDGFR 513-561  
 Mutations  
 ATP-binding pocket

|                                   |                                                                                                          |     |
|-----------------------------------|----------------------------------------------------------------------------------------------------------|-----|
|                                   | M E T D T L L L W V L L L W V P G S T G                                                                  |     |
| <u>iATPSnFR<sup>1.0</sup></u> 1   | ATGGAGACAGACACACTCTGCTATGGGTACTGCTGCTCTGGGTCCAGGTTCCACTGGT                                               | 60  |
| <u>iATPSnFR<sup>1.1</sup></u> 1   | ATGGAGACAGACACACTCTGCTATGGGTACTGCTGCTCTGGGTCCAGGTTCCACTGGT                                               | 60  |
|                                   | D R S M K T I H V S V V T P D G P V Y E                                                                  |     |
| <u>iATPSnFR<sup>1.0</sup></u> 61  | GACAGATCTATGAAGACTATTACAGTGAGTGTCTGTAACCTCCCGACGGGCTGTATATGAG                                            | 120 |
| <u>iATPSnFR<sup>1.1</sup></u> 61  | GACAGATCTATGAAGACTATTACAGTGAGTGTCTGTAACCTCCCGACGGGCTGTATATGAG                                            | 120 |
|                                   | D D V E M V S V K A K S G E L G I L P G                                                                  |     |
| <u>iATPSnFR<sup>1.0</sup></u> 121 | GATGACGTTGAAATGGTGAGCGTCAAAGCAAAAAGTGGCGAGCTCGGTATTCTCCAGGC                                              | 180 |
| <u>iATPSnFR<sup>1.1</sup></u> 121 | GATGACGTTGAAATGGTGAGCGTCAAAGCAAAAAGTGGCGAGCTCGGTATTCTCCAGGC                                              | 180 |
|                                   | H I P L K A P L E I S A A R L K K G G K                                                                  |     |
| <u>iATPSnFR<sup>1.0</sup></u> 181 | CACATTCCCTTGAAAGCTCCCCTAGAGATCAGTGCCGCACGCCTGAAGAAAGGGGGCAA                                              | 240 |
| <u>iATPSnFR<sup>1.1</sup></u> 181 | CACATTCCCTTGAAAGCTCCCCTAGAGATCAGTGCCGCACGCCTGAAGAAAGGGGGCAA                                              | 240 |
|                                   | T Q Y I A V S G G N L E V R P D K V T I                                                                  |     |
| <u>iATPSnFR<sup>1.0</sup></u> 241 | ACACAGTATATCGCTGTGTGAGGCGGCAACCTCGAAGTGCAGGCTGACAAGGTGACCATC                                             | 300 |
| <u>iATPSnFR<sup>1.1</sup></u> 241 | ACACAGTATATCGCTGTGTGAGGCGGCAACCTCGAAGTGCAGGCTGACAAGGTGACCATC                                             | 300 |
|                                   | Y A Q A A <b>E</b> R A E D <b>I</b> <b>D</b> V L <b>R</b> <b>A</b> K <b>A</b> A K                        |     |
| <u>iATPSnFR<sup>1.0</sup></u> 301 | TATGCCCAGGCAGCC <b>GAG</b> AGGGCTGAGGAT <b>ATCGAT</b> GTCCTG <b>CGCGCC</b> AAG <b>GCC</b> GC <b>CAAG</b> | 360 |
| <u>iATPSnFR<sup>1.1</sup></u> 301 | TATGCCCAGGCAGCC <b>GAG</b> AGGGCTGAGGAT <b>ATCGAT</b> GTCCTG <b>CGCGCC</b> AAG <b>AAA</b> GC <b>CAAG</b> | 360 |
|                                   | <b>K</b>                                                                                                 |     |
|                                   | E <b>R</b> A E R R L Q S Q V L S H N V Y I T A                                                           |     |
| <u>iATPSnFR<sup>1.0</sup></u> 361 | GAG <b>AGA</b> GCCGAGCGCCGACTCCAATCACAG <b>GTCTGAGCCACAACGTCTATATCACCGCC</b>                             | 420 |
| <u>iATPSnFR<sup>1.1</sup></u> 361 | GAG <b>AGA</b> GCCGAGCGCCGACTCCAATCACAG <b>GTCTGAGCCACAACGTCTATATCACCGCC</b>                             | 420 |
|                                   | D K Q K N G I K A N F K I R H N V E D G                                                                  |     |
| <u>iATPSnFR<sup>1.0</sup></u> 421 | GACAAGCAGAAGAACGGCATCAAGGCGAACTTCAAGATCCGCCACAACGTGGAGGACGGC                                             | 480 |
| <u>iATPSnFR<sup>1.1</sup></u> 421 | GACAAGCAGAAGAACGGCATCAAGGCGAACTTCAAGATCCGCCACAACGTGGAGGACGGC                                             | 480 |
|                                   | S M Q L A D H Y Q Q N T P I G D G P V L                                                                  |     |
| <u>iATPSnFR<sup>1.0</sup></u> 481 | AGCATGCAGCTCGCCGACCACTACCAGCAGAACACCCCATCGGCGACGGCCCGTGCTG                                               | 540 |
| <u>iATPSnFR<sup>1.1</sup></u> 481 | AGCATGCAGCTCGCCGACCACTACCAGCAGAACACCCCATCGGCGACGGCCCGTGCTG                                               | 540 |
|                                   | L P D N H Y L S T Q S V L S K D P N E K                                                                  |     |
| <u>iATPSnFR<sup>1.0</sup></u> 541 | CTGCCGACAACCCTACTGAGCAGCCAGTCCGTGCTGAGCAAAGACCCTAACGAGAAG                                                | 600 |
| <u>iATPSnFR<sup>1.1</sup></u> 541 | CTGCCGACAACCCTACTGAGCAGCCAGTCCGTGCTGAGCAAAGACCCTAACGAGAAG                                                | 600 |
|                                   | R D H M V L L E F V T A A G I T L G M D                                                                  |     |
| <u>iATPSnFR<sup>1.0</sup></u> 601 | CGCGATCACATGGTCTGCTGGAGTTCGTGACCGCCGCGGGATCACTCTCGGCATGGAC                                               | 660 |
| <u>iATPSnFR<sup>1.1</sup></u> 601 | CGCGATCACATGGTCTGCTGGAGTTCGTGACCGCCGCGGGATCACTCTCGGCATGGAC                                               | 660 |

|                               |      |                                                               |      |
|-------------------------------|------|---------------------------------------------------------------|------|
|                               |      | E L Y K G G T G G S M S K G E E L F T G                       |      |
| <u>iATPSnFR<sup>1.0</sup></u> | 661  | GAGCTGTACAAGGGCGGTACCGGAGGGAGCATGAGCAAGGGCGAGGAGCTGTTACACGGG  | 720  |
| <u>iATPSnFR<sup>1.1</sup></u> | 661  | GAGCTGTACAAGGGCGGTACCGGAGGGAGCATGAGCAAGGGCGAGGAGCTGTTACACGGG  | 720  |
|                               |      | V V P I L V E L D G D V N G H K F S V R                       |      |
| <u>iATPSnFR<sup>1.0</sup></u> | 721  | GTGGTGCCCATCCTGGTCGAGCTGGACGGCGACGTAAACGGCCACAAGTTCAGCGTGCGC  | 780  |
| <u>iATPSnFR<sup>1.1</sup></u> | 721  | GTGGTGCCCATCCTGGTCGAGCTGGACGGCGACGTAAACGGCCACAAGTTCAGCGTGCGC  | 780  |
|                               |      | G E G E G D A T N G K L T L K F I C T T                       |      |
| <u>iATPSnFR<sup>1.0</sup></u> | 781  | GGCGAGGGCGAGGGCGATGCCACCAACGGCAAGCTGACCCTGAAGTTCATCTGCACCACC  | 840  |
| <u>iATPSnFR<sup>1.1</sup></u> | 781  | GGCGAGGGCGAGGGCGATGCCACCAACGGCAAGCTGACCCTGAAGTTCATCTGCACCACC  | 840  |
|                               |      | G K L P V P W P T L V T T L T Y G V Q C                       |      |
| <u>iATPSnFR<sup>1.0</sup></u> | 841  | GGCAAGCTGCCCGTGCCCTGGCCACCCTCGTGACCACCTGACCTACGGCGTGCACTGC    | 900  |
| <u>iATPSnFR<sup>1.1</sup></u> | 841  | GGCAAGCTGCCCGTGCCCTGGCCACCCTCGTGACCACCTGACCTACGGCGTGCACTGC    | 900  |
|                               |      | F S R Y P D H M K Q H D F F K S A M P E                       |      |
| <u>iATPSnFR<sup>1.0</sup></u> | 901  | TTCAGCCGCTACCCCGACCACATGAAGCAGCAGACTTCTTCAAGTCCGCCATGCCCGAA   | 960  |
| <u>iATPSnFR<sup>1.1</sup></u> | 901  | TTCAGCCGCTACCCCGACCACATGAAGCAGCAGACTTCTTCAAGTCCGCCATGCCCGAA   | 960  |
|                               |      | G Y V Q E R T I S F K D D G T Y K T R A                       |      |
| <u>iATPSnFR<sup>1.0</sup></u> | 961  | GGCTACGTCCAGGAGCGCACCATCAGCTTCAAGGACGACGGCACCTACAAGACCCGCGCC  | 1020 |
| <u>iATPSnFR<sup>1.1</sup></u> | 961  | GGCTACGTCCAGGAGCGCACCATCAGCTTCAAGGACGACGGCACCTACAAGACCCGCGCC  | 1020 |
|                               |      | E V K F E G D T L V N R I E L K G I D F                       |      |
| <u>iATPSnFR<sup>1.0</sup></u> | 1021 | GAGGTGAAGTTCGAGGGCGACACCCTGGTGAACCGCATCGAGCTGAAGGGCATCGACTTC  | 1080 |
| <u>iATPSnFR<sup>1.1</sup></u> | 1021 | GAGGTGAAGTTCGAGGGCGACACCCTGGTGAACCGCATCGAGCTGAAGGGCATCGACTTC  | 1080 |
|                               |      | K E D G N I L G H K L E Y N F G L H D I                       |      |
| <u>iATPSnFR<sup>1.0</sup></u> | 1081 | AAGGAGGACGGCAACATCTGGGGCACAAGCTGGAGTACAACCTTTGGGTTGCACGACATC  | 1140 |
| <u>iATPSnFR<sup>1.1</sup></u> | 1081 | AAGGAGGACGGCAACATCTGGGGCACAAGCTGGAGTACAACCTTTGGGTTGCACGACATC  | 1140 |
|                               |      | D F K R A E L <b>A</b> L K <b>R</b> A M N <b>R</b> L S V A E  |      |
| <u>iATPSnFR<sup>1.0</sup></u> | 1141 | GATTTTAAGCGCGCCGAGCTCGCCCTTAAGCGCGCAATGAATAGGCTCTCAGTTGCCGAA  | 1200 |
| <u>iATPSnFR<sup>1.1</sup></u> | 1141 | GATTTTAAGCGCGCCGAGCTCAGCCTTAAGCGCGCAATGAATAGGCTCTCAGTTGCCGAA  | 1200 |
|                               |      | <b>S</b>                                                      |      |
|                               |      | M K G G T G G S L Q V D E Q K L I S E E                       |      |
| <u>iATPSnFR<sup>1.0</sup></u> | 1201 | ATGAAGGGAGGGACCGGCGGTAGCCTGCAGGTCGACGAACAAAAAATCATCTCAGAAGAG  | 1260 |
| <u>iATPSnFR<sup>1.1</sup></u> | 1201 | ATGAAGGGAGGGACCGGCGGTAGCCTGCAGGTCGACGAACAAAAAATCATCTCAGAAGAG  | 1260 |
|                               |      | D L N A V G Q D T Q E V I V V P H S L P                       |      |
| <u>iATPSnFR<sup>1.0</sup></u> | 1261 | GATCTGAATGCTGTGGGCCAGGACACGACAGGAGGTCATCGTGGTGCCACACTCCTTGCCC | 1320 |
| <u>iATPSnFR<sup>1.1</sup></u> | 1261 | GATCTGAATGCTGTGGGCCAGGACACGACAGGAGGTCATCGTGGTGCCACACTCCTTGCCC | 1320 |
|                               |      | F K V V V I S A I L A L V V L T I I S L                       |      |
| <u>iATPSnFR<sup>1.0</sup></u> | 1321 | TTTAAGGTGGTGGTGTATCTCAGCCATCCTGGCCCTGGTGGTGCTCACCATCATCTCCCTT | 1380 |
| <u>iATPSnFR<sup>1.1</sup></u> | 1321 | TTTAAGGTGGTGGTGTATCTCAGCCATCCTGGCCCTGGTGGTGCTCACCATCATCTCCCTT | 1380 |

|                               |      |                                         |      |
|-------------------------------|------|-----------------------------------------|------|
|                               |      | I I L I M L W Q K K P A *               |      |
| <u>iATPSnFR<sup>1.0</sup></u> | 1381 | ATCATCCTCATCATGCTTTGGCAGAAGAAGCCACGTTAG | 1419 |
|                               |      |                                         |      |
| iATPSnFR <sup>1.1</sup>       | 1381 | ATCATCCTCATCATGCTTTGGCAGAAGAAGCCACGTTAG | 1419 |

**Supplementary Figure 1** Sequence alignment of the iATPSnFR<sup>1.0</sup> and iATPSnFR<sup>1.1</sup> cDNAs. The sequences were aligned with Vector NTI and have been deposited at Addgene with the plasmids (see Supplementary Table 2 for plasmid IDs).

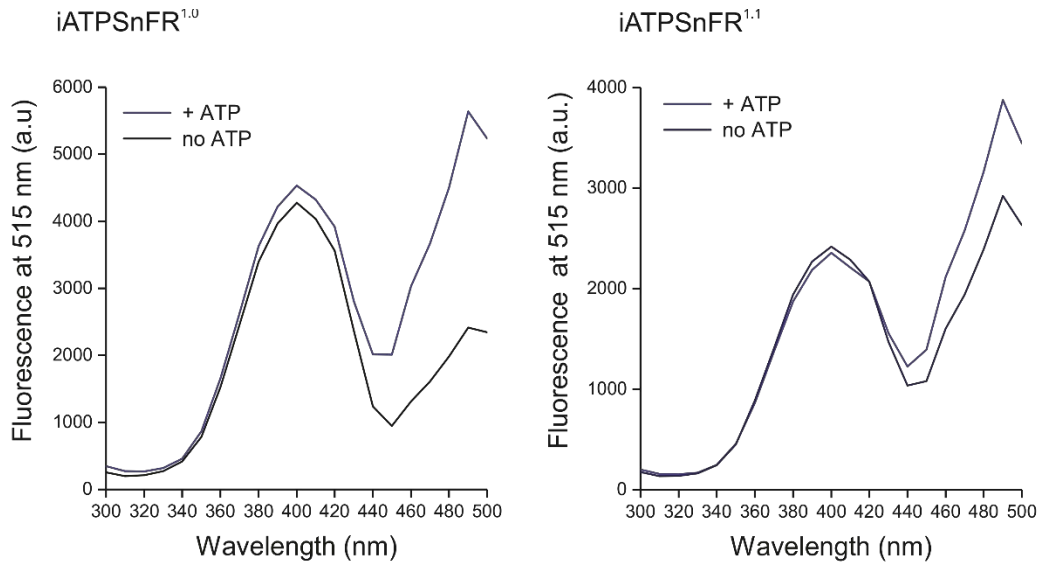

**Supplementary Figure 2** Excitation spectra for iATPSnFR<sup>1.0</sup> and iATPSnFR<sup>1.1</sup> shown over an extended range in relation to those reported in Figure 1 of the main manuscript (the traces are the average from 48 replicates each in a 96 well plate).

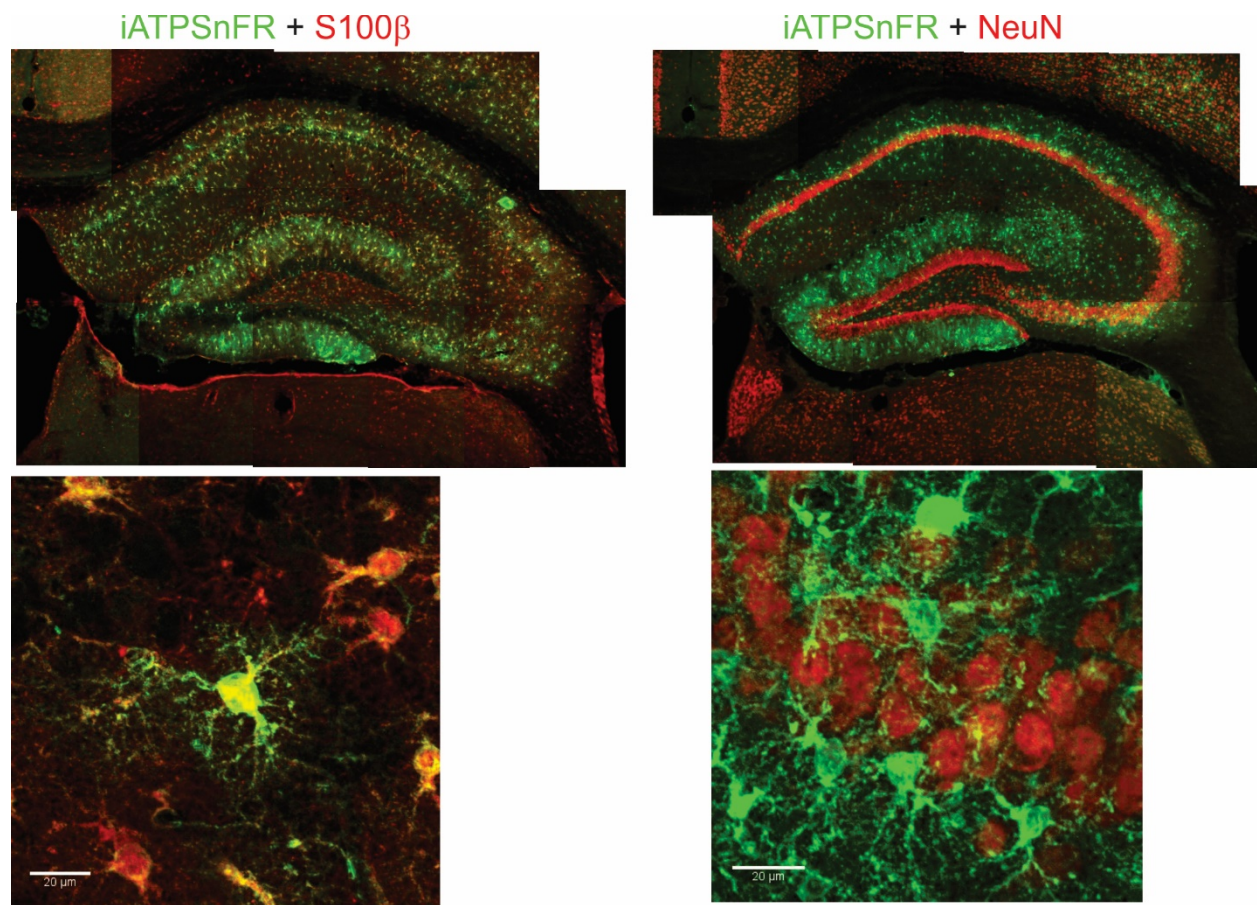

**Supplementary Figure 3** iATPSnFR<sup>1.0</sup> was expressed in S100β-positive astrocytes, but not neurons following *in vivo* expression with AAV2/5 and the *GfaABC1D* promoter. The representative images are from 4 similar mice. Note also that iATPSnFR<sup>1.0</sup> was found throughout the astrocyte's processes.

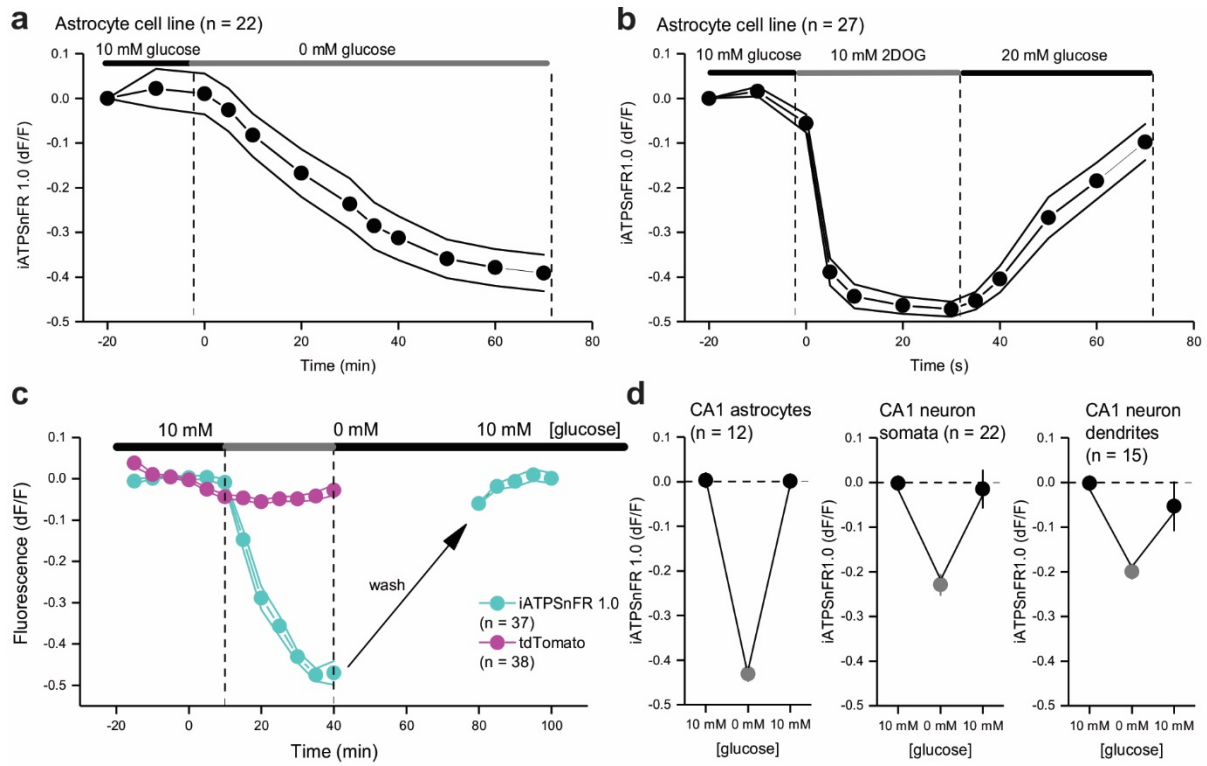

**Supplementary Figure 4** Responses of cytosolic iATPSnFR<sup>1.0</sup>. **(a)** Drop in fluorescence in U373MG astroglia during 0 mM glucose applications. **(b)** Drop in fluorescence in U373MG astroglia during 2DOG to reduce glycolysis. **(c)** As in (a), but for expression of iATPSnFR<sup>1.0</sup> in hippocampal astrocytes with AAV. **(d)** Summary from experiments such as those in (c) for hippocampal astrocytes, CA1 pyramidal neurons, and dendrites. The error bars represent the s.e.m. and in some cases are smaller than the symbols used for the mean. n numbers are provided in the figure panels, which for panels a and b are regions of interest (ROIs) and for c and d are the numbers of cells.

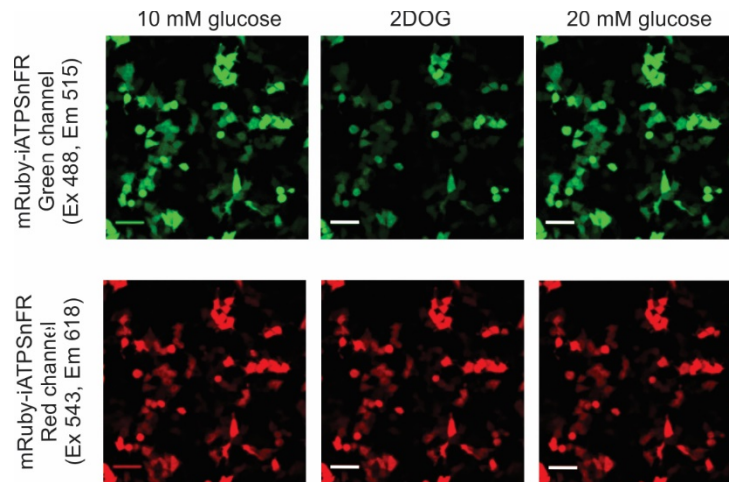

**Supplementary Figure 5** Representative images for mRuby-iATPSnFR<sup>1.0</sup> expressed in HEK-293 cells and subjected to 2DOG (glycolysis inhibitor).



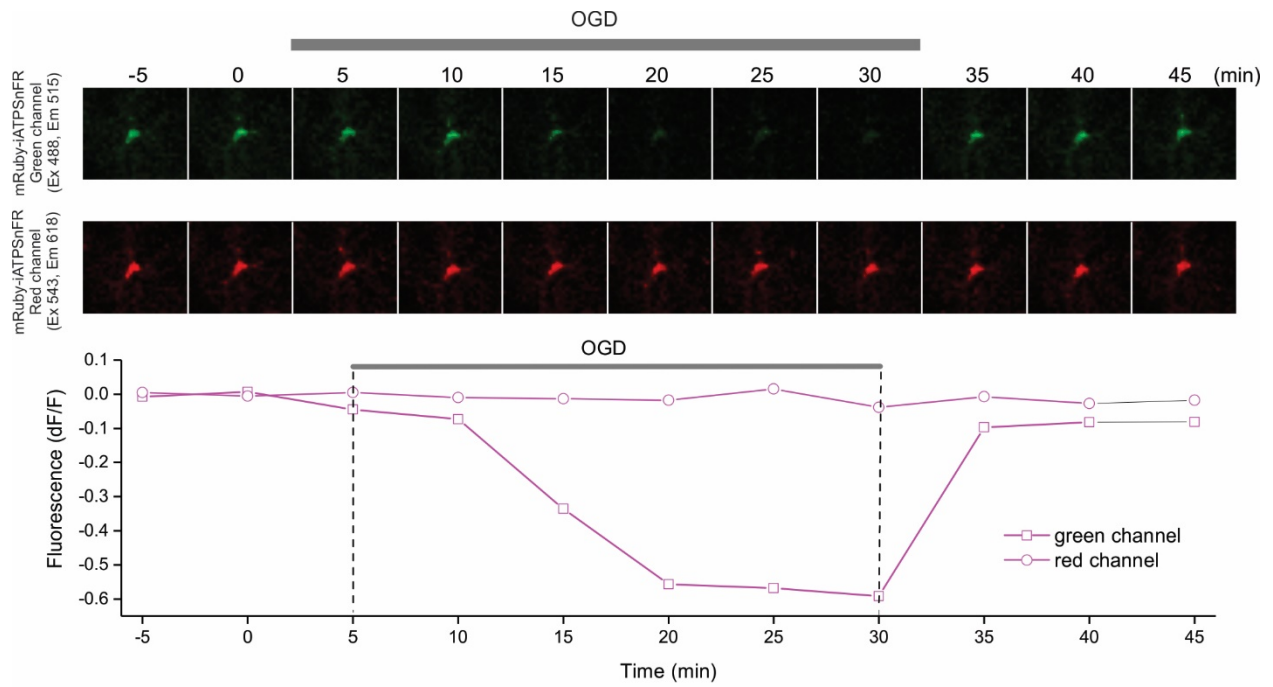

**Supplementary Figure 6** Representative traces and images of an astrocyte expressing mRuby-iATPSnFR<sup>1.0</sup> in hippocampal brain slices following *in vivo* delivery with AAV2/5. Oxygen-glucose deprivation caused clear decreases in iATPSnFR<sup>1.0</sup> fluorescence, but left mRuby fluorescence intact.

**a. iATPSnFR<sup>1.0</sup> on the surface of HEK293 cells**

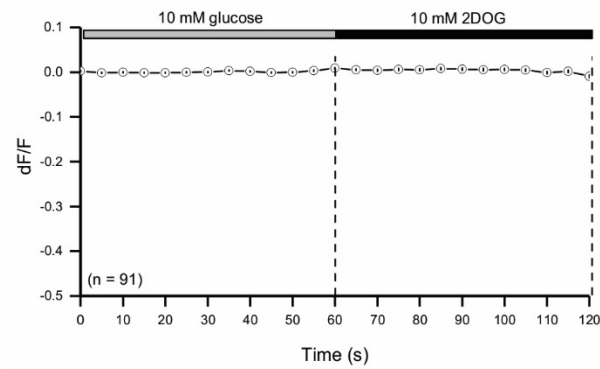

**b. Intracellular BCECF imaging in HEK293 cells**

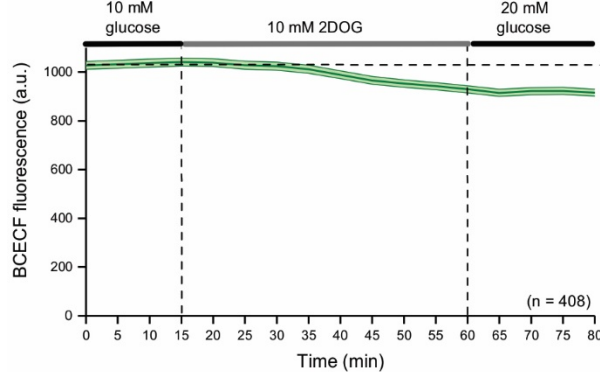

**Supplementary Figure 7 Control experiments for iATPSnFR<sup>1.0</sup>.** (a) Cell surface iATPSnFR<sup>1.0</sup> did not respond to 10 mM 2DOG. Hence, 2DOG does not affect the optical properties of iATPSnFR<sup>1.0</sup> directly. (b) The pH indicator dye BCECF was used to image pH level changes in HEK293 cells before, during and after application of 10 mM 2DOG. A 10% drop in fluorescence, corresponding to around a 0.1 pH unit acidification, was detected. This occurred slowly and was not reversible after washout of 2DOG. The error bars represent the s.e.m. and in some cases are smaller than the symbols used for the mean. n numbers are provided in the figure panels.

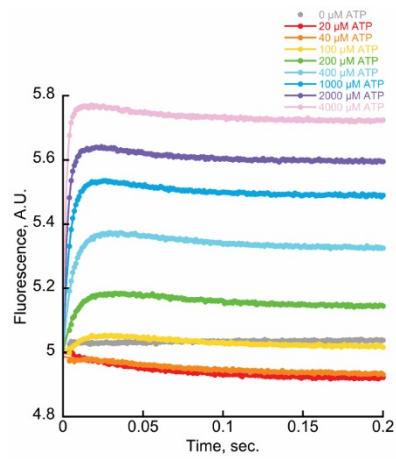

**Supplementary Figure 8** Stopped-flow kinetics for iATPSnFR<sup>1.0</sup> measured in purified protein (from bacterial expression).

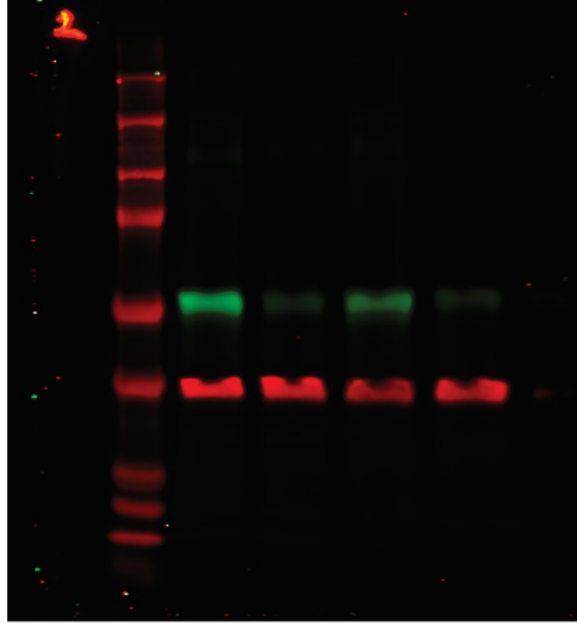

**Supplementary Figure 9** Full uncropped gel to accompany Figure 3f of the main manuscript. The molecular weight markers are 250, 148, 98, 64, 50, 36, 22, 16, 6, 4 kDa. The first two lanes are shown on the main Figure 3f. Lanes 3 and 4 are the same experiment but from a different batch run on the same gel.

**Supplementary Table 1** Comparison of known genetically encoded ATP sensors based on the use of fluorescent proteins.

|                         | Sensor name             | Type           | Optical property          | dF/F (dR/R) | Kd      | pKa  | t <sub>on</sub> (s <sup>-1</sup> ) | t <sub>off</sub> (s <sup>-1</sup> ) | Reference  |
|-------------------------|-------------------------|----------------|---------------------------|-------------|---------|------|------------------------------------|-------------------------------------|------------|
| cytosolic               | AT1.03                  | FRET           | mseCFP-cpVenus            | 1.3         | 3.3 mM  | <7   | ND                                 | 0.098                               | 1          |
|                         | AT1.03-YEMK             | FRET           | mseCFP-cpVenus            | ND          | 1.2 mM  | ND   | ND                                 | ND                                  | 1          |
|                         | AT3.10                  | FRET           | mseCFP-cpVenus            | ~1          | 7.4 μM  | ND   | ND                                 | ND                                  | 1          |
|                         | AT3.10-GMK              | FRET           | mseCFP-cpVenus            | ND          | 14 μM   | ND   | ND                                 | ND                                  | 1          |
|                         | AT1.03-NL               | FRET           | mseCFP-cpVenus            | 0.99        | 1.77 mM | <7   | ND                                 | 0.029                               | 2          |
|                         | GO-ATeam1               | FRET           | cpGFP-mKO                 | ~1.2        | 7.1 mM  | <6.3 | ND                                 | 0.13                                | 3          |
|                         | GO-ATeam2               | FRET           | cpGFP-mKO                 | ~2          | 2.3 mM  | ND   | ND                                 | ND                                  | 3          |
|                         | EAF-ATeam               | FRET           | GFP-YFP                   | ND          | <10 μM  | ND   | ND                                 | ND                                  | 4          |
|                         | Perceval                | cpmVenus       | 490 nm, ~515 nm           | ~2          | 0.04 μM | ND   | ND                                 | ND                                  | 5          |
|                         | Perceval-HR             | cpmVenus       | 420 nm, ~515 nm<br>490 nm | ~7          | 3.4 μM  | ND   | ND                                 | 0.5                                 | 6          |
|                         | MaLionG                 | Citrine        | 565 nm, 585 nm            | 3.9         | 1.1 mM  | ~6.7 | ND                                 | 0.095                               | 7          |
|                         | MaLionR                 | mApple         | 505 nm, 522 nm            | 3.5         | 0.34 mM | ~6.5 | ND                                 | 0.016                               | 7          |
|                         | MaLionB                 | BFP            | 373 nm, 446 nm            | 0.9         | 0.46 mM | 4.9  | ND                                 | 0.015                               | 7          |
|                         | Queen-7 μM              | cpGFP          | 400 nm, 513 nm<br>494 nm  | ~4          | 7 μM    | <7   | ND                                 | ND                                  | 8          |
|                         | Queen-2 mM              | cpGFP          | 400 nm, 513 nm<br>494 nm  | ~3.5        | 2 mM    | ND   | ND                                 | ND                                  | 8          |
|                         | iATPSnFR <sup>1.0</sup> | cpSFGFP        | 490 nm, 512 nm            | 2.4         | 120 μM  | 6.5  | ND                                 | ND                                  | This study |
| iATPSnFR <sup>1.1</sup> | cpSFGFP                 | 490 nm, 512 nm | 1.9                       | 50 μM       | ND      | ND   | ND                                 | This study                          |            |
| Cell surface            | ecAT3.10                | FRET           | mseCFP-cpVenus            | 0.27        | 12 μM   | ND   | <0.0042                            | <0.01                               | 9          |
|                         | iATPSnFR <sup>1.0</sup> | cpSFGFP        | 490 nm, 512 nm            | 1.0         | 350 μM  | 6.5  | 0.47                               | 0.58                                | This study |
|                         | iATPSnFR <sup>1.1</sup> | cpSFGFP        | 490 nm, 512 nm            | 0.9         | 140 μM  | ND   | 1.1                                | 0.58                                | This study |

**Key to table:** ND means not determined. dR/R refers to the measurements with FRET based sensors and indicates a change (delta) in the FRET ratio, R upon ATP binding at maximal concentrations. The equivalent value for the single-wavelength sensors is dF/F. For the FRET-based sensors, the “optical property” indicates the donor and acceptor FPs. For the single-wavelength sensors, the “optical property” lists the excitation and emission wavelengths. As can be seen, the kinetics were not reported for most of the sensors, but from the available data the fastest ATP sensors are iATPSnFR<sup>1.0</sup> and iATPSnFR<sup>1.1</sup>, which we characterized in this study.

| <b>Plasmid name</b>                                              | <b>Expresses in</b> | <b>Vector</b>      | <b>Addgene ID</b> |
|------------------------------------------------------------------|---------------------|--------------------|-------------------|
| HHM-iATPSnFR <sup>1.0</sup>                                      | Bacteria            | HHM modified pRSET | 102546            |
| HHM-iATPSnFR <sup>1.1</sup>                                      | Bacteria            | HHM modified pRSET | 102547            |
| pm-iATPSnFR <sup>1.0</sup>                                       | Mammalian cells     | pDisplay           | 102548            |
| pm-iATPSnFR <sup>1.1</sup>                                       | Mammalian cells     | pDisplay           | 102549            |
| cyto-iATPSnFR <sup>1.0</sup>                                     | Mammalian cells     | modified pDisplay  | 102550            |
| cyto-iATPSnFR <sup>1.0</sup> -mScarlet                           | Mammalian cells     | modified pDisplay  |                   |
| cyto-iATPSnFR <sup>1.0</sup> -P2A-mScarlet                       | Mammalian cells     | modified pDisplay  |                   |
| cyto-Ruby3-iATPSnFR <sup>1.0</sup>                               | Mammalian cells     | modified pDisplay  | 102551            |
| cyto-LSSmOrange-iATP                                             | Mammalian cells     | modified pDisplay  |                   |
| GfaABC <sub>1</sub> D-pm-iATPSnFR <sup>1.0</sup>                 | Mouse astrocytes    | pZac               | 102552            |
| GfaABC <sub>1</sub> D-pm-iATPSnFR <sup>1.1</sup>                 | Mouse astrocytes    | pZac               |                   |
| GfaABC <sub>1</sub> D-cyto-iATPSnFR <sup>1.0</sup>               | Mouse astrocytes    | pZac               | 102553            |
| GfaABC <sub>1</sub> D-cyto-iATPSnFR <sup>1.0</sup> -mScarlet     | Mouse astrocytes    | pZac               |                   |
| GfaABC <sub>1</sub> D-cyto-Ruby3-iATPSnFR <sup>1.0</sup>         | Mouse astrocytes    | pZac               | 102554            |
| GfaABC <sub>1</sub> D-cyto-LSSmOrange-iATPSnFR <sup>1.0</sup>    | Mouse astrocytes    | pZac               |                   |
| GfaABC <sub>1</sub> D-cyto-iATPSnFR <sup>1.0</sup> -P2A-mScarlet | Mouse astrocytes    | pZac               |                   |
| Synapsin-pm-iATPSnFR <sup>1.0</sup>                              | Mouse neurons       | pSynapsin          | 102555            |
| Synapsin-pm-iATPSnFR <sup>1.1</sup>                              | Mouse neurons       | pSynapsin          |                   |
| Synapsin-cyto-iATPSnFR <sup>1.0</sup>                            | Mouse neurons       | pSynapsin          | 102556            |
| Synapsin-cyto-iATPSnFR <sup>1.0</sup> -mScarlet                  | Mouse neurons       | pSynapsin          |                   |
| Synapsin-cyto-Ruby3-iATPSnFR <sup>1.0</sup>                      | Mouse neurons       | pSynapsin          | 102557            |
| Synapsin-cyto-LSSmOrange-iATPSnFR <sup>1.0</sup>                 | Mouse neurons       | pSynapsin          |                   |
| Synapsin-cyto-iATPSnFR <sup>1.0</sup> -P2A-mScarlet              | Mouse neurons       | pSynapsin          |                   |

**Supplementary Table 2** Details of the new plasmids generated in this study along with the Addgene IDs.

## References

- 1 Imamura, H. *et al.* Visualization of ATP levels inside single living cells with fluorescence resonance energy transfer-based genetically encoded indicators. *Proc Natl Acad Sci U S A* **106**, 15651-15656 (2009).
- 2 Tsuyama, T. *et al.* In vivo fluorescent adenosine 5'-triphosphate (ATP) imaging of *Drosophila melanogaster* and *Caenorhabditis elegans* by using a genetically encoded fluorescent ATP biosensor optimized for low temperatures. *Anal Chem* **85**, 7889-7896 (2013).
- 3 Nakano, M., Imamura, H., Nagai, T. & Noji, H. Ca<sup>2+</sup> regulation of mitochondrial ATP synthesis visualized at the single cell level. *ACS Chem Biol* **6**, 709-715 (2011).
- 4 Zadrán, S. *et al.* Enhanced-acceptor fluorescence-based single cell ATP biosensor monitors ATP in heterogeneous cancer populations in real time. *Biotechnol Lett* **35**, 175-180 (2013).
- 5 Berg, J., Hung, Y. P. & Yellen, G. A genetically encoded fluorescent reporter of ATP:ADP ratio. *Nat Methods* **6**, 161-166 (2009).
- 6 Tantama, M., Martínez-François, J. R., Mongeon, R. & Yellen, G. Imaging energy status in live cells with a fluorescent biosensor of the intracellular ATP-to-ADP ratio. *Nat Commun* **4:2550**. doi: [10.1038/ncomms3550](https://doi.org/10.1038/ncomms3550). (2013).
- 7 Arai, S. *et al.* RGB-Color Intensiometric Indicators to Visualize Spatiotemporal Dynamics of ATP in Single Cells. *Angew Chem Int Ed Engl* **57**, 10873-10878 (2018).
- 8 Yaginuma, H. *et al.* Diversity in ATP concentrations in a single bacterial cell population revealed by quantitative single-cell imaging. *Sci Rep* (2014).
- 9 Conley, J. M., Radhakrishnan, S., Valentino, S. A. & Tantama, M. Imaging extracellular ATP with a genetically-encoded, ratiometric fluorescent sensor. *PLoS One* **Nov 9;12(11):e0187481**. doi: [10.1371/journal.pone.0187481](https://doi.org/10.1371/journal.pone.0187481) (2017).
